# Supplementary material
Source: HighWire-hosted journal article supplement (https://bmjopen.bmj.com/content/15/5/e087697)
Supplement: inline-supplementary-material-1 [file inline-supplementary-material-1.pdf]

**Supplementary Material: Active Start Active Future Study Protocol paper****Supplement 1:** Bibliography of terms**Supplement 2:** Consent form for participation in Active Start Active Future intervention**Supplement 3:** Consent form of Active Start Active Future Interviews**Supplement 4:** Interview Guide at T2**Supplement 5:** Interview Guide at T3**Supplement 6:** Active Start Active Future Acceptability Questionnaire**Supplement 7:** Barriers to Participation in Physical Activity Questionnaire (BPPA-Q)

**Supplement 1: Bibliography of Terms**

|                                                                                                              |                                                                                                                                                                                                                                                                                                                                                                                                                                                                                                                                                                                                                                                                                   |
|--------------------------------------------------------------------------------------------------------------|-----------------------------------------------------------------------------------------------------------------------------------------------------------------------------------------------------------------------------------------------------------------------------------------------------------------------------------------------------------------------------------------------------------------------------------------------------------------------------------------------------------------------------------------------------------------------------------------------------------------------------------------------------------------------------------|
| Canadian Occupational Performance Measure (COPM)                                                             | The Canadian Occupational Performance Measure COPM <sup>1</sup> will be used to measure performance of and satisfaction of the child's physical activity, attendance and/or involvement goals and parents attendance and involvement goal. Setting physical activity participation goals for children with CP has been used previously in participation focused interventions <sup>2-4</sup> .                                                                                                                                                                                                                                                                                    |
| Daily moderate-to-vigorous PA (MVPA) and sedentary time.                                                     | Activity monitors such as the ActiGraph GT3X+ are valid for use in typically developing children <sup>5</sup> and children with CP <sup>6-9</sup> . The ActiGraph GT1M was found feasible for both non ambulatory and ambulatory youth with CP to measure total and moderate-vigorous physical activity levels <sup>10</sup> .                                                                                                                                                                                                                                                                                                                                                    |
| <u>Gross Motor Function Measure-66-IS</u>                                                                    | The GMFM-66-IS is validated for children with CP aged 1-17 years <sup>11,12</sup> and is a shorter version than the 66 or 88 measure.                                                                                                                                                                                                                                                                                                                                                                                                                                                                                                                                             |
| Cerebral Palsy Quality of Life Questionnaire for Children, Parent-proxy Version (CP QOL-Child) <sup>13</sup> | The CP QOL has good concurrent validity, internal consistency ( $\alpha$ 0.80-0.90) and test-retest reliability for parent report for children with CP 4-12 years of age <sup>13</sup> .                                                                                                                                                                                                                                                                                                                                                                                                                                                                                          |
| Barriers to Participation in Physical Activities Questionnaire (BPPA-Q)                                      | The BPPA-Q has been developed by the authors and was used initially for Participate CP <sup>14,15</sup> and now for Participate CP 2. The BPPAQ was based on a validated and reliable instrument called the Determinants of Implementation Behaviour Questionnaire used in implementation behaviour interventions <sup>16</sup> and was constructed based on the Theoretical Domains Framework <sup>17</sup> . When using the BPPA-Q, results from Participate CP demonstrated a reduction in modifiable barriers to participation in physical activity for children 8-12 years with CP (MD=26.39; 95%CI, 6.13-46.67; P=.011) compared with usual care at 8 weeks <sup>14</sup> . |
| Belief in Goal Self-Competence Scale, <sup>18</sup>                                                          | The BiGSS asks the child and/or parent to                                                                                                                                                                                                                                                                                                                                                                                                                                                                                                                                                                                                                                         |

|                                                                    |                                                                                                                                                                                                                                                                                                                                                              |
|--------------------------------------------------------------------|--------------------------------------------------------------------------------------------------------------------------------------------------------------------------------------------------------------------------------------------------------------------------------------------------------------------------------------------------------------|
| BiGSS                                                              | rate their level of confidence that a goal can be achieved using the COPM 1-10 scale. The Participate CP intervention group rated higher levels of confidence post intervention (MD=1.31; 95% CI, 0.12-2.50; P<.001) and at 16 weeks follow up (MD=1.47; 95% CI, 0.30-2.64; P<.001) than the usual care group <sup>14</sup> .                                |
| The Active Australia Survey <sup>19</sup>                          | The Active Australia Survey is a self-report measure of physical activity for adults. It asks participants to report time spent walking, and in moderate and vigorous intensity physical activity. Overall volume of moderate-vigorous physical activity can be estimated, as well as whether participants meet physical activity guidelines <sup>20</sup> . |
| Health Promoting Activities Scale (HPAS) <sup>21</sup>             | The HPAS will measure frequency of self-selected leisure activities for the key parent and has been validated in mothers of children with disabilities and mothers with their own personal health concerns <sup>21,22</sup> .                                                                                                                                |
| Past-day Adults' Sedentary Time (PAST) Questionnaire <sup>23</sup> | The Past-day Adults' Sedentary Time Questionnaire is a self-report, 7-item survey where participants are asked to report time spent in domains of sedentary behaviour during the past 24 hours <sup>24</sup> .                                                                                                                                               |
| Acceptability Questionnaire                                        | Acceptability questions are modelled on the Theoretical Framework of Acceptability of Sekhon <sup>25</sup> which has been used in healthcare interventions.                                                                                                                                                                                                  |
| Qualitative Interviews                                             | A qualitative descriptive approach will be implemented to explore the experiences of the children and parents/caregivers that may not be captured in the quantitative data collection <sup>26</sup> . Informed by interviews following the intervention and sustained behaviour change 6 months post intervention.                                           |
| Family of Participation Related Constructs <sup>27</sup>           | Theoretical framework for defining and understanding participation, identifying participation constructs and applying to research and practice. Goals are set for attendance and involvement – the two key participation constructs <sup>27</sup> .                                                                                                          |



Supplement 2: Consent form for participation in Active Start Active Future intervention

ACTIVE START ACTIVE FUTURE (2) Parent/ Guardian Consent Form

|                                                             |                                                                                                                                                                                                          |
|-------------------------------------------------------------|----------------------------------------------------------------------------------------------------------------------------------------------------------------------------------------------------------|
| Project Title                                               | Active Start Active Future: a randomised control trial of an early behaviour-change intervention targeting physical activity participation and sedentary behaviour in young children with cerebral palsy |
| Protocol Number                                             | V1.2 11.09.2024                                                                                                                                                                                          |
| Coordinating Principal Investigator/ Principal Investigator | Dr Gaela Kilgour, Dr Sarah Reedman, Dr Sjaan Gomersall, A/Prof Leanne Sakzewski, Prof Stewart Trost, Prof Roslyn Boyd                                                                                    |

I/We,

voluntarily consent to participate in the above titled Research Project explained to me by:

Mrs/Ms/Dr/Professor \_\_\_\_\_

- I/We have read the information statement for this study and I/we believe I/we understand the purpose, extent and possible effects of my involvement.
- I/We have had an opportunity to ask questions and I/we am satisfied with the answers I/we have received.
- I/We understand information collected will be stored confidentially and my/our identity will not be revealed.
- I/We understand that I/we can refuse to participate and can withdraw from this study at any time without any negative consequence. In particular, I/we understand that my/our participation will not affect my child's access to usual medical care.
- I/We understand if I/We do withdraw, any de-identified (including re-identifiable) data may be retained and included in analyses unless I/We say No
- I/We consent to my de-identified data being used in possible future approved research projects, in publications, conferences, and for teaching/education purposes.
- I/We understand that the purpose of this study is to assist children with cerebral palsy to participate in physical activity and move more; and that my/our active involvement, including critical feedback, is valued.
- I/We understand that in order to evaluate the intervention I/we will be asked to complete questionnaires, assist my/our child wear activity monitors and be interviewed during the study.
- I/We consent to having videos of my/our child recorded and photos taken of them being active for the study for research purpose.
- I/We consent to study staff accessing my child's medical record for the purposes of confirming diagnosis, functional classification or motor type and distribution of cerebral palsy
- I/We understand that I/we will receive an end of intervention report
- **I/We consent to participate in this research project.**

**Parent/caregiver Signature** \_\_\_\_\_ **Date** \_\_\_\_\_

**Name:** \_\_\_\_\_

**Email Address:** \_\_\_\_\_ **Phone number:** \_\_\_\_\_

I have explained this study and I believe that the participant/s understands the purpose, extent and possible effects of involvement.

**Researcher's Signature** \_\_\_\_\_ **Date** \_\_\_\_\_

Note: All parties signing the Consent Form must date their own signature.

Supplement 3: Consent form for participation in Active Start Active Future interview

Parent and Community Workers Consent Form for Active Start Active Future Interview

**Project Title:** Active Start Active Future: a randomised control trial of an early behaviour-change intervention targeting physical activity participation and sedentary behaviour in young children with cerebral palsy

**HREC Number:** HREC/2023/QCHQ/100850

**Investigators:** Dr Gaela Kilgour, Dr Sarah Reedman, Dr Sjaan Gomersall, A/Prof Leanne Sakzewski, Prof Stewart Trost, Prof Roslyn Boyd

**Version Number:** 1.2**Version Date:** 6/12/2023

Declaration

- I have read the Interview Information Sheet or someone has read it to me in a language that I understand.
- I understand the purposes, procedures and risks of the research described in the project.
- I have had an opportunity to ask questions and I am satisfied with the answers I have received.
- I freely agree to participating in this research project as described and understand that I am free to withdraw them at any time during the research project without affecting their future health care.
- I understand if I do withdraw, any de-identified (including re-identifiable) data may be retained and included in analyses unless I say No
- I understand that I will be given a signed copy of this document to keep.
- I consent to being interviewed
- I consent to my de-identified data being used in possible future approved research projects, in publications, conferences, and for teaching/education purposes.

|                                    |  |      |
|------------------------------------|--|------|
| Name of Participant (please print) |  |      |
| Signature of Participant           |  | Date |

Declaration by Senior Researcher

I have given a verbal explanation of the research project, its procedures and risks and I believe that the participant has understood that explanation.

|                                                          |      |
|----------------------------------------------------------|------|
| Name of Senior Researcher <sup>†</sup><br>(please print) |      |
| Signature                                                | Date |

## Supplement 4: Interview Guide at T2

### Interview 1 Parents/caregivers Guide Active Start Active Future

#### Research Questions

What changes, if any, in physical activity participation and sedentary behaviour of young children with cerebral palsy have occurred following **Active Start Active Future?**

What changes, if any, in the physical activity of caregivers of young children with cerebral palsy have occurred following **Active Start Active Future?**

#### Introduction

Thank you very much for allowing [child] to take part in **Active Start Active Future** over the past 8 weeks. The focus of the intervention has been to increase physical activity participation and reduce sedentary time. This interview is to look at whether there have been any changes. During the intervention we have been interested in the goals you have set, changes on the activity monitors, and any new or different activities [child] has participated in and any changes in their involvement. We have also been interested in your role.

We will firstly ask about how you feel about **Active Start Active Future** for **your child**.

So can you tell me...

1. What you thought of the **Active Start Active Future** intervention? (probes re things that helped/didn't help)
  - a. What were you hoping would change for your child? (if needed, can remind re goals (e.g., you wanted him/her to join a football team) (remind of sedentary time, changes in physical activity, attendance, involvement, physical performance)
  - b. During the programme, what was the **most important goal** for your child? Why?
  - c. Were there barriers to implementing your child's [child] goals? (Prompts – equipment, environment, finances, time, interpersonal, child related)
  - d. Can you tell me how physical activity participation/moving more is going for [child]?
  - e. What did your [child] and you have to do make that happen?
  - f. How do you think the intervention has worked for your child's goals?

During **Active Start Active Future** we have been interested in **how often, how many and how involved** [child] has been in **their** activities. We have been keeping a record of this using the goals. We are interested in any changes. Can you tell me...

2. Apart from **Active Start Active Future**, what other physical activities, active recreation, and/or sport [child] has been doing? And as a family [as appropriate]? What is new or different?
  - a. What works well for [child], what makes it harder to do?
  - b. Has there been a change in social connections e.g., being active with others?
  - c. What might 'being involved' look like for [child]?
  - d. How does being 'not involved' feel for your child?
  - e. What else would you like to tell me about how participation in physical activity is going for [child]? And your family [as appropriate]?

During **Active Start Active Future** we have been interested in **how much your child has moved**. We have been keeping a record of this using the activity monitors. We are interested in any changes on the graphs. Can you tell me...



3. What did you think of the activity graphs of [child]?
  - a. Do you think there has been a change in how much [child] moves? Has there been changes to sedentary time? (Changes to routines, habits)
  - b. Has there been any change in [child] sleep, fatigue or pain over the course of the intervention?
  - c. How easy or difficult was it to change your [child's] routine? Can you tell me how that is going for [child]?

Now we would like to ask about how you feel about **Active Start Active Future** for yourself providing support for (child's name). So can you tell me...

4.
  - a. During the programme, what was the **most important goal** for you as a parent/family/carer/coach [as appropriate]? Why?
  - b. Has being involved in **Active Start Active Future** influenced your thoughts about participation in physical activity for your [child]?
  - c. Has there been any changes in your own activity?
  - d. Can you tell me about the influence of the intervention on your own confidence to help your child be more active?
  - e. Can you tell me about how acceptable you found the program? (Prompt – ask this question if responses from the questionnaire need following up)
5. When thinking about how you support your child to be active,
  - a. What might be needed to help [child] be more involved?
  - b. What happens when [child] is not involved – how does that make you feel? What do you do to try to change it if it isn't going well? What might help?
  - c. Do you feel like your ability to support your child to be more involved has changed over the course of the intervention?
  - d. What is needed to keep [child] being active? And your family?
  - e. Did the graphs influence your feelings about how [child] spends their time?
  - f. Did the graph feedback have an effect on the support you provided?
  - g. Were there barriers to implementing your goals?
  - h. How easy or difficult was it to change your routine?

Is there anything else you would like to feedback at this time?

Please feel free to contact me on email or phone if you have any further thoughts.

Thank you so much for your time.

## Supplement 5: Interview Guide T3

### Interview 2: Parents/caregivers guide at 26 weeks

#### Research Question

What factors support or hinder children to be physically active, reduce sedentary behaviour and to develop a habit for physical activity beyond **Active Start Active Future**?

### Introduction

Thank you for your continued support of **Active Start Active Future**. The focus of the intervention has been to increase physical activity participation and reduce sedentary time. This interview is to look at whether there have been any changes following the intervention for your child followed by you. So can you tell me...

### Interview Questions

1. Can you tell me what your child's physical activity looks like now?  
Prompts – over the last week, since the intervention, have there been any changes? (e.g., changes to sedentary behaviour, new/different activities, involvement changes)
2. What was **most useful/valuable for your child** following **Active Start Active Future**? Prompts – consider physical functioning, involvement, social connection
3. Can you tell me **how important** being active, staying active and moving more (reducing sedentary time) is to your child? You? And your family (as appropriate)?(use 0-10 score)
4. What was **most useful/valuable for you** following **Active Start Active Future**? (as per role)  
Prompts – did it influence your motivation for physical activity, did it change views about how your child is active or can be active, did it change thoughts on the amount of activity is needed and is possible, did it influence your confidence to help your child be active?
5. Are there other activities that your child/family are planning to do in the future?
6. How do you feel family (as appropriate) preferences influence the physical activities [child] does?
7. What do you think **your role** is in supporting [child] being active, staying active and moving more? Prompt - how habits formed, your level of motivation, support, importance of being active.
8. Do you have **plans for how to support** your child to stay physically active? Can you tell me about them – what will you need to help you do this? What might you need to keep sustaining physical activity moving forwards and help [child] move more?
9. If we were to offer **Active Start Active Future** to other kids, is there anything we should do differently? Would you recommend it to other kids? What would you tell them?

Is there anything else you would like to feedback at this time (could include sleep, pain, and/or fatigue if this was indicated in the first interview)? Please feel free to contact me on email or phone if you have any further thoughts. Thank you so much for your time.



Supplement 6: Active Start Active Future Acceptability Questionnaire

Active Start Active Future Parent Questionnaire

Thank you for participating in Active Start Active Future. In order for us to improve our intervention, could you please spend 5 minutes answering the following questions using a 5 point scale (strongly disagree to strongly agree). Please leave any additional comments in the space provided. Please let us know if you need any help.

The following questions are about your experiences with the Active Start Active Future

1. The Active Start intervention met my needs

|                   |          |                           |       |                |
|-------------------|----------|---------------------------|-------|----------------|
| Strongly disagree | Disagree | Neither disagree or agree | Agree | Strongly agree |
|-------------------|----------|---------------------------|-------|----------------|

2. I felt supported during the Active Start visits

|                   |          |                           |       |                |
|-------------------|----------|---------------------------|-------|----------------|
| Strongly disagree | Disagree | Neither disagree or agree | Agree | Strongly agree |
|-------------------|----------|---------------------------|-------|----------------|

3. Attending the Active Start intervention sessions was easy

|                   |          |                           |       |                |
|-------------------|----------|---------------------------|-------|----------------|
| Strongly disagree | Disagree | Neither disagree or agree | Agree | Strongly agree |
|-------------------|----------|---------------------------|-------|----------------|

4. The Active Start intervention helped me understand my child’s level of physical activity participation

|                   |          |                           |       |                |
|-------------------|----------|---------------------------|-------|----------------|
| Strongly disagree | Disagree | Neither disagree or agree | Agree | Strongly agree |
|-------------------|----------|---------------------------|-------|----------------|

5. The Active Start intervention helped me understand, identify and overcome barriers for my child’s physical activity participation

|                   |          |                           |       |                |
|-------------------|----------|---------------------------|-------|----------------|
| Strongly disagree | Disagree | Neither disagree or agree | Agree | Strongly agree |
|-------------------|----------|---------------------------|-------|----------------|

6. The Active Start intervention helped me understand and identify my own values of physical activity participation

|                   |          |                           |       |                |
|-------------------|----------|---------------------------|-------|----------------|
| Strongly disagree | Disagree | Neither disagree or agree | Agree | Strongly agree |
|-------------------|----------|---------------------------|-------|----------------|

7. Attending the Active Start intervention sessions was worthwhile

|                   |          |                           |       |                |
|-------------------|----------|---------------------------|-------|----------------|
| Strongly disagree | Disagree | Neither disagree or agree | Agree | Strongly agree |
|-------------------|----------|---------------------------|-------|----------------|

8. I found the setting, location and timing of the intervention suitable

|                   |          |                           |       |                |
|-------------------|----------|---------------------------|-------|----------------|
| Strongly disagree | Disagree | Neither disagree or agree | Agree | Strongly agree |
|-------------------|----------|---------------------------|-------|----------------|

9. The Active Start therapist was welcoming

|                   |          |                           |       |                |
|-------------------|----------|---------------------------|-------|----------------|
| Strongly disagree | Disagree | Neither disagree or agree | Agree | Strongly agree |
|-------------------|----------|---------------------------|-------|----------------|

10. The therapist explained things clearly and involved me in discussions

|                   |          |                           |       |                |
|-------------------|----------|---------------------------|-------|----------------|
| Strongly disagree | Disagree | Neither disagree or agree | Agree | Strongly agree |
|-------------------|----------|---------------------------|-------|----------------|

11. The therapist treated me with respect

|                   |          |                           |       |                |
|-------------------|----------|---------------------------|-------|----------------|
| Strongly disagree | Disagree | Neither disagree or agree | Agree | Strongly agree |
|-------------------|----------|---------------------------|-------|----------------|

12. I felt my cultural needs were meet

|                   |          |                           |       |                |
|-------------------|----------|---------------------------|-------|----------------|
| Strongly disagree | Disagree | Neither disagree or agree | Agree | Strongly agree |
|-------------------|----------|---------------------------|-------|----------------|

13. I found the practical advice given was useful

|                   |          |                           |       |                |
|-------------------|----------|---------------------------|-------|----------------|
| Strongly disagree | Disagree | Neither disagree or agree | Agree | Strongly agree |
|-------------------|----------|---------------------------|-------|----------------|

14. My follow up plans were helpful

|                   |          |                           |       |                |
|-------------------|----------|---------------------------|-------|----------------|
| Strongly disagree | Disagree | Neither disagree or agree | Agree | Strongly agree |
|-------------------|----------|---------------------------|-------|----------------|

15. I was happy with the format of the intervention

|                   |          |                           |       |                |
|-------------------|----------|---------------------------|-------|----------------|
| Strongly disagree | Disagree | Neither disagree or agree | Agree | Strongly agree |
|-------------------|----------|---------------------------|-------|----------------|

Do you have comments about your experiences as part of the intervention?

Do you have any suggestions for improving the intervention?

***Thank you for your time and participation.***

Supplement 7: Barriers to Participation in Physical Activity Questionnaire (BPPA-Q)

Participant ID: \_\_\_\_\_ DATE: \_\_\_\_\_ ☐ Baseline    ☐ 8 Weeks    ☐ 26 Weeks

Barriers to Participation in Physical Activities Questionnaire.

Your responses to this questionnaire will help us to understand the things that help your child participate in physical activities as well as the things that make participation harder. Please answer as truthfully as possible, giving a rating of strongly disagree to strongly agree for each item. This questionnaire might take up to 30 minutes to complete. Remember to read each statement carefully because there are both 'positive' and 'negative' statements.

Q2

EXAMPLE SCENARIO

You think you might know *some* things that are healthy for your child to eat, but on a whole you are not sure you know what makes up a healthy diet. **You 'Somewhat disagree' to the statement "I know what constitutes a healthy diet for my child"**

Strongly disagree

Disagree

Somewhat disagree

Neutral

Somewhat agree

I know what constitutes a healthy diet for my child

Read each statement carefully and mark your agreement with it on a scale of 1 (strongly disagree) to 7 (strongly agree). Keep checking to see if you have selected the right one!

|                                                                                                                                                                                        | Strongly disagree (1) | Disagree (2)          | Somewhat disagree (3) | Neutral (4)           | Somewhat agree (5)    | Agree (6)             | Strongly agree (7)    |
|----------------------------------------------------------------------------------------------------------------------------------------------------------------------------------------|-----------------------|-----------------------|-----------------------|-----------------------|-----------------------|-----------------------|-----------------------|
| I know how much physical activity my child needs to do each day to be healthy                                                                                                          | <input type="radio"/> |
| I think it is safe for my child with cerebral palsy to participate in physical activities and/or sports                                                                                | <input type="radio"/> |
| I know enough about the facilities available in my neighborhood to be able to access physical activities and/or sports there                                                           | <input type="radio"/> |
| My child has enough physical/movement skills to participate in physical activities and/or sports with the supports currently available to us                                           | <input type="radio"/> |
| My child has the right cognitive/thinking or communication (talking/social) skills to participate in the physical activities and/or sports with the supports currently available to us | <input type="radio"/> |
| My child has had enough practice or opportunity to develop skills for physical activities and/or sports                                                                                | <input type="radio"/> |

Read each statement carefully and mark your agreement with it on a scale of 1 (strongly disagree) to 7 (strongly agree). Keep checking to see if you have selected the right one!

|  |          |          |          |         |          |       |          |
|--|----------|----------|----------|---------|----------|-------|----------|
|  | Strongly | Disagree | Somewhat | Neutral | Somewhat | Agree | Strongly |
|--|----------|----------|----------|---------|----------|-------|----------|



|                                                                                                                                            | disagree (1)          | (2)                   | disagree (3)          | (4)                   | agree (5)             | (6)                   | agree (7)             |
|--------------------------------------------------------------------------------------------------------------------------------------------|-----------------------|-----------------------|-----------------------|-----------------------|-----------------------|-----------------------|-----------------------|
| Participating in physical activities and/or sports is part of what we do as a family                                                       | <input type="radio"/> |
| I am confident that my child can do enough physical activity to be healthy                                                                 | <input type="radio"/> |
| I am confident that my child can participate in physical activities and/or sports even when there seems to be a lot of barriers in the way | <input type="radio"/> |
| I am confident that I can support my child to participate in physical activity                                                             | <input type="radio"/> |
| I have control over the amount of physical activity that my child does                                                                     | <input type="radio"/> |
| Others (including my child) have control over the amount of physical activity that my child does                                           | <input type="radio"/> |

Read each statement carefully and mark your agreement with it on a scale of 1 (strongly disagree) to 7 (strongly agree). Keep checking to see if you have selected the right one!

|                                                                                                                                                                   | Strongly disagree (1) | Disagree (2)          | Somewhat disagree (3) | Neutral (4)           | Somewhat agree (5)    | Agree (6)             | Strongly agree (7)    |
|-------------------------------------------------------------------------------------------------------------------------------------------------------------------|-----------------------|-----------------------|-----------------------|-----------------------|-----------------------|-----------------------|-----------------------|
| My child shows that they are happy or having fun when they are trying to participate in physical activities and/or sports                                         | <input type="radio"/> |
| When my child is participating in physical activities and/or sports, I usually expect the best                                                                    | <input type="radio"/> |
| When my child participates in physical activities and/or sports, nothing good ever seems to come of it                                                            | <input type="radio"/> |
| For my child, participating in physical activities and/or sports is beneficial to their health and wellbeing                                                      | <input type="radio"/> |
| When my child participates in physical activities and/or sports, I reward my child with praise, pocket money, time with technology, or food                       | <input type="radio"/> |
| When my child participates in physical activities and/or sports, the reward is how good it makes them feel physically or the good feelings from being with others | <input type="radio"/> |
| If something bad happened after physical activities and/or sports (e.g., injury, hurt feelings, pain), It would discourage my child from participating again      | <input type="radio"/> |

Read each statement carefully and mark your agreement with it on a scale of 1 (strongly disagree) to 7 (strongly agree). Keep checking to see if you have selected the right one!

|                                                                                                       | Strongly disagree (1) | Disagree (2)          | Somewhat disagree (3) | Neutral (4)           | Somewhat agree (5)    | Agree (6)             | Strongly agree (7)    |
|-------------------------------------------------------------------------------------------------------|-----------------------|-----------------------|-----------------------|-----------------------|-----------------------|-----------------------|-----------------------|
| My child is already regularly participating in physical activities and/or sports                      | <input type="radio"/> |
| I prioritise other things over participating in physical activities and/or sports for my child        | <input type="radio"/> |
| We set goals for my child’s participation in physical activities and/or sports                        | <input type="radio"/> |
| Participating in sports or being physically active makes my child so tired that it is not worth doing | <input type="radio"/> |

|                                                                                                                                                                              | Strongly disagree (1) | Disagree (2)          | Somewhat disagree (3) | Neutral (4)           | Somewhat agree (5)    | Agree (6)             | Strongly agree (7)    |
|------------------------------------------------------------------------------------------------------------------------------------------------------------------------------|-----------------------|-----------------------|-----------------------|-----------------------|-----------------------|-----------------------|-----------------------|
| My family has enough money to support my child’s participation in physical activities and/or sports                                                                          | <input type="radio"/> |
| My family has enough time to support my child’s participation in physical activities and/or sports                                                                           | <input type="radio"/> |
| My family has access to the right transport (e.g. wheelchair accessible van/ maxi taxi/ accessible bus) to get to physical activities and/or sports                          | <input type="radio"/> |
| My child has access to the right aids, equipment or personal care to support participation in physical activities and/or sports                                              | <input type="radio"/> |
| There are physical activities and/or sport programs in my community that would be willing or are able to accommodate my child                                                | <input type="radio"/> |
| My child's abilities do not match the supports or programs that are available                                                                                                | <input type="radio"/> |
| I feel that the community supports my child’s participation in physical activities and/or sports, regardless of their disability                                             | <input type="radio"/> |
| Community members, coaches, or volunteers have, in the past, indicated that they don't value my child's participation in physical activities and/or sports                   | <input type="radio"/> |
| Aspects of the environment, like sunlight or noise, make it hard for my child to participate in physical activities and/or sports                                            | <input type="radio"/> |
| Aspects of the environment, like physical access (ramps, distances travelled, playing surface) make it hard for my child to participate in physical activities and/or sports | <input type="radio"/> |

Read each statement carefully and mark your agreement with it on a scale of 1 (strongly disagree) to 7 (strongly agree). Keep checking to see if you have selected the right one!

|                                                                | Strongly disagree (1) | Disagree (2)          | Somewhat disagree (3) | Neutral (4)           | Somewhat agree (5)    | Agree (6)             | Strongly agree (7)    |
|----------------------------------------------------------------|-----------------------|-----------------------|-----------------------|-----------------------|-----------------------|-----------------------|-----------------------|
| Most people who are important to my child are participating in | <input type="radio"/> |

|                                                                                                                          |                       |                       |                       |                       |                       |                       |                       |
|--------------------------------------------------------------------------------------------------------------------------|-----------------------|-----------------------|-----------------------|-----------------------|-----------------------|-----------------------|-----------------------|
| physical activities and/or sports                                                                                        |                       |                       |                       |                       |                       |                       |                       |
| My child can count on support from people close to them when it is hard for my child to participate                      | <input type="radio"/> |
| Friends, siblings and/or classmates are helpful to my child with participating in physical activities and/or sports      | <input type="radio"/> |
| My child is left out of things because it is so much harder for them to participate in physical activities and/or sports | <input type="radio"/> |
| When I think of my child participating in physical activities and/or sports, I feel fearful or anxious                   | <input type="radio"/> |

Read each statement carefully and mark your agreement with it on a scale of 1 (strongly disagree) to 7 (strongly agree). Keep checking to see if you have selected the right one!

|                                                                                                                                                                                        | Strongly disagree (1) | Disagree (2)          | Somewhat disagree (3) | Neutral (4)           | Somewhat agree (5)    | Agree (6)             | Strongly agree (7)    |
|----------------------------------------------------------------------------------------------------------------------------------------------------------------------------------------|-----------------------|-----------------------|-----------------------|-----------------------|-----------------------|-----------------------|-----------------------|
| When my I think of my child participating in physical activities and/or sports, I feel upset or sad                                                                                    | <input type="radio"/> |
| When I think of my child participating in physical activities and/or sports, I feel happy or cheerful                                                                                  | <input type="radio"/> |
| Participating in sports or being physically active (for example, playing/ walking/ running/ wheeling) is something that my child does automatically; they don't have to think about it | <input type="radio"/> |
| I keep track of how much physical activity and/or sport my child is doing                                                                                                              | <input type="radio"/> |

YOU ARE FINISHED ALL OF THE QUESTIONS. If any of the questions, statements, or answers on this questionnaire caused you concern or worry, please do not hesitate to contact the study Chief Investigator

## Supplement References:

1. Law M, Baptiste S, Carswell A, McColl M, Polatajko H, Pollock N. *Canadian Occupational Performance Measure*. 5th ed. CAOT Publications ACE; 2014.
2. Kilgour G, Stott NS, Steele M, Adair B, Hogan A, Imms C. Effects of a 12 week community-based high-level mobility programme on sustained participation in physical activity by adolescents with cerebral palsy: a single subject research design study. *Disability and Rehabilitation*. 2023;1-11. doi:10.1080/09638288.2023.2256225
3. Lauruschkus K, Hallström I, Westbom L, Tornberg Å, Nordmark E. Participation in physical activities for children with cerebral palsy: feasibility and effectiveness of physical activity on prescription. *Archives of Physiotherapy*. 2017;11/28 2017;7(1):13. doi:10.1186/s40945-017-0041-9
4. Reedman S, Boyd R, Sakzewski L. Efficacy of a participation-focused therapy intervention on participation in physical activities, health-related quality of life, and behavioural barriers to participation in children with cerebral palsy. *Developmental Medicine & Child Neurology*. 2017;59:20. doi:10.1111/dmcn.26-13511
5. Robusto KM, Trost SG. Comparison of three generations of ActiGraph™ activity monitors in children and adolescents. *Journal of Sports Science*. 2012;30(13):1429-1435. doi:10.1080/02640414.2012.710761
6. Clanchy KM, Tweedy SM, Boyd RN, Trost SG. Validity of accelerometry in ambulatory children and adolescents with cerebral palsy. *European Journal of Applied Physiology*. 2011;111(12):2951-2959. doi:10.1007/s00421-011-1915-2
7. Keawutan P, Bell KL, Oftedal S, Davies PSW, Boyd RN. Validation of accelerometer cut-points in children with cerebral palsy aged 4 to 5 years. *Pediatric Physical Therapy*. 2016;28(4):427-34. doi:10.1097/PEP.0000000000000291
8. Mitchell LE, Ziviani J, Boyd RN. Variability in Measuring Physical Activity in Children with Cerebral Palsy. *Medicine & Science in Sports & Exercise*. 2015;47(1):194-200. doi:10.1249/MSS.0000000000000374
9. Ahmadi M, O'Neil M, Fragala-Pinkham M, Lennon N, Trost S. Machine learning algorithms for activity recognition in ambulant children and adolescents with cerebral palsy. *J Neuroeng Rehabil*. 2018;15(1):105-105. doi:10.1186/s12984-018-0456-x
10. Gorter JW, Noorduyn SG, Obeid J, Timmons BW. Accelerometry: A Feasible Method to Quantify Physical Activity in Ambulatory and Nonambulatory Adolescents with Cerebral Palsy. *Int J Pediatr*. 2012;2012:329284-6. doi:10.1155/2012/329284
11. Avery LM, Russell DJ, Rosenbaum PL. Criterion validity of the GMFM-66 item set and the GMFM-66 basal and ceiling approaches for estimating GMFM-66 scores. *Developmental Medicine & Child Neurology*. 2013;55(6):534-538. doi:10.1111/dmcn.12120
12. Russell DJ, Avery LM, Walter SD, et al. Development and validation of item sets to improve efficiency of administration of the 66-item Gross Motor Function Measure in children with cerebral palsy. *Developmental Medicine & Child Neurology*. 2010;52(2):e48-e54. doi:10.1111/j.1469-8749.2009.03481.x
13. Waters E, Davis E, Mackinnon A, et al. Psychometric properties of the quality of life questionnaire for children with CP. *Developmental Medicine & Child Neurology*. 2007;49(1):49-55. doi:10.1017/S0012162207000126.x
14. Reedman SE, Boyd RN, Trost SG, Elliott C, Sakzewski L. Efficacy of participation-focused therapy on performance of physical activity participation goals and habitual physical activity in children with cerebral palsy: a randomized controlled trial. *Archives of Physical Medicine and Rehabilitation*. 2019;100(4):676-686. doi:10.1016/j.apmr.2018.11.012
15. Reedman SE, Boyd RN, Elliott C, Sakzewski L. ParticiPate CP: a protocol of a randomised waitlist controlled trial of a motivational and behaviour change therapy intervention to increase physical activity through meaningful participation in children with cerebral palsy. *BMJ Open*. 2017;7(8)doi:10.1136/bmjopen-2017-015918

16. Huijg JM, Gebhardt WA, Dusseldorp E, et al. Measuring determinants of implementation behavior: psychometric properties of a questionnaire based on the theoretical domains framework. *Implementation Science*. 2014;9:1-15.
17. Sakzewski L, Reedman SE, Elliott C, et al. Participate CP 2: optimising participation in physically active leisure for children with cerebral palsy—protocol for a phase III randomised controlled trial. *BMJ Open*. 2023;13(10):e075570.
18. Ziviani J, Poulsen AA, Kotaniemi K, Law M. The Belief in Goal Self-Competence Scale (BiGSS) – exploring a new way to support individual goal pursuit and document occupational therapy outcomes in paediatric practice. *Australian Occupational Therapy Journal*. 2014;61(5):316-324. doi:10.1111/1440-1630.12140
19. Welfare AloHa. *The Active Australia Survey: A guide and manual for implementation, analysis and reporting*. 2003.
20. Brown WJ, Burton NW, Marshall AL, Miller YD. Reliability and validity of a modified self-administered version of the Active Australia physical activity survey in a sample of mid-age women. *Australian and New Zealand journal of public health*. 2008;32(6):535-541.
21. Bourke-Taylor H, Law M, Howie L, Pallant JF. Initial development of the Health Promoting Activities Scale to measure the leisure participation of mothers of children with disabilities. *The American Journal of Occupational Therapy*. 2012;66(1):e1-e10.
22. Bourke-Taylor H, Lalor A, Farnworth L, Pallant JF. Further validation of the Health Promoting Activities Scale with mothers of typically developing children. *Australian Occupational Therapy Journal*. 2014;61(5):308-315.
23. Clark BK, Winkler E, Healy GN, et al. Adults' Past-Day Recall of Sedentary Time: Reliability, Validity, and Responsiveness. *Medicine & Science in Sports & Exercise*. 2013;45(6):1198-1207. doi:10.1249/MSS.0b013e3182837f57
24. Clark BK, Winkler E, Healy GN, et al. Adults' past-day recall of sedentary time: reliability, validity and responsiveness. 2013;
25. Sekhon M, Cartwright M, Francis JJ. Acceptability of healthcare interventions: an overview of reviews and development of a theoretical framework. *BMC Health Services Research*. 2017;17(1):1-13.
26. Doyle L, McCabe C, Keogh B, Brady A, McCann M. An overview of the qualitative descriptive design within nursing research. *Journal of Research in Nursing*. 2020;25(5):443-455. doi:10.1177/1744987119880234
27. Imms C, Granlund M, Wilson PH, Steenbergen B, Rosenbaum PL, Gordon AM. Participation, both a means and an end: a conceptual analysis of processes and outcomes in childhood disability. *Developmental Medicine & Child Neurology*. 2017;59(1):16-25.
